# Supplementary material
Source: publisher figshare collection journal article supplement (https://springernature.figshare.com/ndownloader/files/14548400)
Supplement: Supplementary file 1 [file 14548400]

Additional file 3: **Table S1** The primer sequences used in our study.

| Name | Primer sequence(5’-3’) | application |
| --- | --- | --- |
| VIP1-F | TACGCCGCCGCTTCTTCCGCCTACA | Cloning and transgenic detection |
| VIP1-R | CTTACCAAGCATTTCCTTCCAACAT | Cloning and transgenic detection |
| VIP1-Rt-F | CCAATCCCAGTCTGCCACCT | Real-time PCR |
| VIP1-Rt-R | TCAACCCGAGTCCATCAAAGA | Real-time PCR |
| ActinF | CACTGGTGTGATGGTTGGTA | Real-time PCR |
| ActinR | CTGGATAGCAACATACATAGCC | Real-time PCR |
| VIP1-121-F | acgggggactctagaggatccTACGCCGCCGCTTCTTCC | Expression vector construction |
| VIP1-121-R | cgatcggggaaattcgagctcCTTACCAAGCATTTCCTTCCAAC | Expression vector construction |
| VIP1-V-F | ggcctcgagacgcgtgagctcGCCGTTGATGGTGTTAAGAAAAC | VIGS vector construction |
| VIP1-V-R | agaaggcctccatggggatccATAGCCTGTAGCCGTAGTTTCAGTT | VIGS vector construction |
| NtActinF | AAGGGATGCGAGGATGGA | Real-time PCR |
| NtActinR | CAAGGAAATCACCGCTTTGG | Real-time PCR |
| NtPR1likeF | CGGCGGGAGCAGTAAAGATG | Real-time PCR |
| NtPR-likeR | CGAACCCTAGCACAACCAAGAC | Real-time PCR |
| NtPR-1F | CAATGAGAAACAGTATTATGCCCACG | Real-time PCR |
| NtPR-1R | GAACCCTAGCACATCCAACACGAA | Real-time PCR |
| NtRar1likeF | AAACAAGGGCTGTGGTAAGA | Real-time PCR |
| NtRar1likeR | CTCATCCGGTCATGGAAGATAG | Real-time PCR |
| NtHSPF | CTCGGAACCACTTACTCTT | Real-time PCR |
| NtHSPR | TCCTACCAATCAGCCTTT | Real-time PCR |
| NtRPP13F | GATTTGGGTGAACTATGC | Real-time PCR |
| NtRPP13R | ACTGTCCGCAATACTTAC | Real-time PCR |
